# Supplementary material for: E-therapy in the treatment and prevention of eating disorders: A systematic review and meta-analysis
Source: PubMed Central journal article supplement — Behav Res Ther. 2014 Dec;63:122–31. doi: 10.1016/j.brat.2014.09.011 (PMC4271736; doi:10.1016/j.brat.2014.09.011), 2014-12
Supplement: mmc3.pdf [file mmc3.pdf]

**Supplementary figure 2 – Summary of risk of bias assessments for each study**

|                    | Random sequence generation (selection bias) | Allocation concealment (selection bias) | Blinding of participants and personnel (performance bias) | Blinding of outcome assessment (detection bias) | Incomplete outcome data (attrition bias) | Selective reporting (reporting bias) |
|--------------------|---------------------------------------------|-----------------------------------------|-----------------------------------------------------------|-------------------------------------------------|------------------------------------------|--------------------------------------|
| Carrard 2011       | +                                           | -                                       | ?                                                         | ?                                               | +                                        | ?                                    |
| Celio 2000         | ?                                           | ?                                       | ?                                                         | ?                                               | ?                                        | ?                                    |
| Doyle 2008         | +                                           | ?                                       | ?                                                         | +                                               | ?                                        | -                                    |
| Fichter 2012       | +                                           | +                                       | ?                                                         | +                                               | +                                        | +                                    |
| Fichter 2013       | +                                           | +                                       | ?                                                         | +                                               | ?                                        | +                                    |
| Franko 2005        | +                                           | ?                                       | +                                                         | ?                                               | +                                        | ?                                    |
| Hötzel 2014        | +                                           | ?                                       | ?                                                         | ?                                               | -                                        | ?                                    |
| Jacobi 2007        | +                                           | ?                                       | ?                                                         | ?                                               | ?                                        | ?                                    |
| Jacobi 2012        | ?                                           | ?                                       | ?                                                         | +                                               | +                                        | ?                                    |
| Jones 2008         | +                                           | ?                                       | ?                                                         | -                                               | +                                        | +                                    |
| Low 2006           | ?                                           | ?                                       | ?                                                         | ?                                               | ?                                        | ?                                    |
| Ruwaard 2013       | +                                           | +                                       | ?                                                         | ?                                               | ?                                        | ?                                    |
| Sánchez-Ortiz 2010 | +                                           | +                                       | ?                                                         | +                                               | +                                        | +                                    |
| Schmidt 2008       | +                                           | +                                       | ?                                                         | +                                               | -                                        | +                                    |
| Shapiro 2007       | +                                           | ?                                       | ?                                                         | -                                               | -                                        | ?                                    |
| Stice 2012         | ?                                           | ?                                       | ?                                                         | +                                               | +                                        | ?                                    |
| Taylor 2006        | +                                           | ?                                       | ?                                                         | +                                               | +                                        | ?                                    |
| Wagner 2013        | +                                           | ?                                       | ?                                                         | ?                                               | ?                                        | +                                    |
| Winzelberg 1998    | ?                                           | ?                                       | ?                                                         | ?                                               | ?                                        | ?                                    |
| Winzelberg 2000    | ?                                           | ?                                       | ?                                                         | ?                                               | +                                        | ?                                    |
| Zabinski 2001      | ?                                           | ?                                       | ?                                                         | ?                                               | +                                        | ?                                    |

Note:  
 + = Low risk of bias  
 ? = Unclear risk of bias  
 - = High risk of bias
